# Supplementary material for: Mortality, patient-reported outcome measures, and the health economic burden of prosthetic joint infection
Source: PubMed Central journal article supplement — EFORT Open Rev. 2023 Sep 1;8(9):690–7. doi: 10.1530/EOR-23-0078 (PMC10548306; doi:10.1530/eor-23-0078), 2023-09-01
Supplement: EOR-23-0078supplementary_material.pdf [file EOR-23-0078supplementary_material.pdf]

**Table S1: Characteristics of 30 included studies**

| <b>Study characteristics</b>                        | <b>N (%)</b> |
|-----------------------------------------------------|--------------|
| <b>Country income level†</b>                        |              |
| High                                                | 27 (90.0)    |
| Middle                                              | 3 (10.0)     |
| Low                                                 | 0 (0)        |
| <b>Study type</b>                                   |              |
| Prospective cohort                                  | 4 (13.3)     |
| Retrospective cohort                                | 24 (80.0)    |
| other (cross sectional, retrospective case control) | 2 (6.7)      |
| <b>Anatomical Location‡</b>                         |              |
| Knee PJI                                            | 20 (66.7)    |
| Hip PJI                                             | 20 (66.7)    |
| Other (shoulder/all arthroplasty)                   | 3 (10.0)     |
| <b>Outcomes addressed†</b>                          |              |
| Mortality rate                                      | 9 (30.0)     |
| Patient reported outcome measures (PROMS)           | 8 (26.7)     |
| Cost                                                | 18 (60.0)    |
| Length of stay (LOS)                                | 13 (43.3)    |
| <b>Total</b>                                        | <b>N=30</b>  |

†As per the New World Bank current 2022 fiscal year

‡Some studies contained more than one infection type/outcome addressed

PJI=prosthetic joint infection

**Table S2: Mortality rate for infected and uninfected cohorts**

| Author                  | Year | Infection type                    | Surgery                                                           | Mortality rate for infected (%)                              | Mortality rate for uninfected (%)                          | Cause of mortality | Time of mortality                           |
|-------------------------|------|-----------------------------------|-------------------------------------------------------------------|--------------------------------------------------------------|------------------------------------------------------------|--------------------|---------------------------------------------|
| Boddapati <sup>1</sup>  | 2018 | Knee PJI                          | TKA followed by either PJI revision or aseptic revision if needed | 0.16 in revision                                             | 0.16 in revision and 0.11 in primary TKA                   | Unspecified        | Within 30 days                              |
| Choi <sup>2</sup>       | 2014 | Knee PJI                          | TKA followed by septic or aseptic revision                        | 18                                                           | 3                                                          | Unspecified        | At a median of 4 years                      |
| Gundtoft <sup>3</sup>   | 2017 | Hip PJI                           | TKA followed by either PJI revision or aseptic revision if needed | 7.64                                                         | Aseptic revision: 4.89<br>Primary THA: 2.86                | Unspecified        | Within 1 year of primary THA                |
| Hotchen <sup>4</sup>    | 2021 | Knee, hip, elbow and shoulder PJI | TKA followed by either PJI or aseptic revision if needed          | 3.6                                                          | N/A                                                        | PJI-related        | N/A                                         |
| Kapadia <sup>5</sup>    | 2014 | Knee PJI                          | TKA followed by 2 stage revision for PJI                          | 0                                                            | 0                                                          | N/A                | N/A                                         |
| Kapadia <sup>6</sup>    | 2016 | Hip PJI                           | THA followed by 2 stage revision for PJI                          | 0                                                            | 0                                                          | N/A                | N/A                                         |
| Shahi <sup>7</sup>      | 2017 | Knee and hip PJI                  | Primary followed by revision THA, TKA                             | 0.77                                                         | 0.38                                                       | Unspecified        | In hospital mortality                       |
| Wildeman <sup>8</sup>   | 2021 | Hip PJI                           | THA followed by revision, DAIR if needed.                         | 45                                                           | 29                                                         | Unspecified        | 10 year mortality rate                      |
| Zmistowski <sup>9</sup> | 2013 | Knee and hip PJI                  | TKA, THA followed by PJI revision or aseptic revision             | 90 days: 3.7<br>1 year: 10.6<br>2 year: 13.6<br>5 year: 25.9 | 90 days: 0.8<br>1 year: 2.0<br>2 year: 3.9<br>5 year: 12.9 | Unspecified        | Within 90 days, 1 year, 2 years and 5 years |

N/A = not applicable

**Table S3: Overview of assessment tools used in included studies**

| Questionnaire                                                            | Domain  | Aim                                           | Number of Questions | Subdomains                                                                                                                                                                                                                                                               | Number of Studies |
|--------------------------------------------------------------------------|---------|-----------------------------------------------|---------------------|--------------------------------------------------------------------------------------------------------------------------------------------------------------------------------------------------------------------------------------------------------------------------|-------------------|
| Ambulatory outcome                                                       | (HR)QoL | Assess ability to walk independently          | 4                   | Ambulate without assistive device<br>Able to walk with one crutch/stick<br>Able to walk with two crutches/sticks<br>Unable to walk                                                                                                                                       | 1                 |
| EuroQoL-5D (EQ-5D)                                                       | QoL     | General health                                | 6                   | Self-care<br>Mobility<br>Activities<br>Pain/discomfort<br>Anxiety/Depression                                                                                                                                                                                             | 4                 |
| Harris Hip Score (HHS)                                                   | (HR)QoL | Hip dysfunction                               | 10                  | Pain<br>Function<br>Absence of deformity<br>Range of motion                                                                                                                                                                                                              | 2                 |
| ICD-10-based symptom rating (ISR)                                        | (HR)QoL | Psychiatric disorder severity                 | 29                  | Depressive syndrome<br>Anxiety syndrome<br>Obsessive-compulsive syndrome<br>Somatoform syndrome<br>Eating disorder syndrome                                                                                                                                              | 1                 |
| Oxford Hip Score (OHS)                                                   | (HR)QoL | Assess hip disability following arthroplasty  | 12                  | Pain and function                                                                                                                                                                                                                                                        | 3                 |
| Oxford Knee Score (OKS)                                                  | (HR)QoL | Assess knee disability following arthroplasty | 12                  | Pain and function                                                                                                                                                                                                                                                        | 1                 |
| Short Form 36 (SF-36)                                                    | QoL     | General health                                | 36                  | <u>Physical Component Score (PCS)</u><br>Physical functioning<br>Bodily pain<br>Physical role functioning<br>General health perceptions<br><br><u>Mental Component Score (MCS)</u><br>Vitality<br>Social role functioning<br>Mental health<br>Emotional role functioning | 1                 |
| Short Form 12 (SF-12)                                                    | QoL     | General health                                | 12                  | <u>Physical Component Score (PCS)</u><br>Physical functioning<br>Bodily pain<br>Physical role functioning<br>General health perceptions<br><br><u>Mental Component Score (MCS)</u><br>Vitality<br>Social role functioning<br>Mental health<br>Emotional role functioning | 3                 |
| Western Ontario and MacMasters Universities Osteoarthritis Index (WOMAC) | (HR)QoL | Disease specific (osteoarthritis)             | 24                  | Pain<br>Function<br>Stiffness                                                                                                                                                                                                                                            | 1                 |

**Table S4: Questionnaires used in each study**

| <b>Author</b>          | <b>Year</b> | <b>Infection Type</b>              | <b>Sample size of infected cohort (n)</b> | <b>Sample size of uninfected cohort (n)</b> | <b>Questionnaire</b>              |
|------------------------|-------------|------------------------------------|-------------------------------------------|---------------------------------------------|-----------------------------------|
| Mur <sup>10</sup>      | 2020        | Hip and knee PJI                   | 109                                       | 218                                         | Ambulatory outcome                |
| Wildeman <sup>8</sup>  | 2021        | Hip PJI                            | 215                                       | 659                                         | Ambulatory outcome, EQ-5D-5L, OHS |
| Poulsen <sup>11</sup>  | 2018        | Hip PJI                            | 45                                        | 1408                                        | EQ-5D, OHS                        |
| Hotchen <sup>4</sup>   | 2021        | Hip, shoulder, knee, and elbow PJI | 220                                       | Unspecified                                 | EQ-5D-3L, OHS, OKS                |
| Romano <sup>12</sup>   | 2010        | Hip PJI                            | 40                                        | 40                                          | HHS, SF-12, WOMAC                 |
| Aboltins <sup>13</sup> | 2013        | Hip PJI                            | 19                                        | 76                                          | HHS, SF-12                        |
| Aboltins <sup>14</sup> | 2016        | Hip and knee PJI                   | 41                                        | 2093                                        | SF-12                             |
| Walter <sup>15</sup>   | 2021        | Knee PJI                           | 36                                        | 7124                                        | EQ-5D, IRS, SF-36                 |

**Table S5: Overview of hospital cost and projected cost for PJI patients and uninfected patients**

| Author                   | Year | Country/<br>country<br>income level | Infection<br>type                   | Sample<br>size of<br>infected<br>cohort | Sample<br>size of<br>uninfected<br>cohort | Cost<br>perspective                                                | Cost<br>measured                                                                                                                                                                                                                             | Cost in infected<br>cohort                                                                 | Cost in<br>uninfected<br>cohort                                                             | Most costly<br>component<br>in infected<br>cohort                       |
|--------------------------|------|-------------------------------------|-------------------------------------|-----------------------------------------|-------------------------------------------|--------------------------------------------------------------------|----------------------------------------------------------------------------------------------------------------------------------------------------------------------------------------------------------------------------------------------|--------------------------------------------------------------------------------------------|---------------------------------------------------------------------------------------------|-------------------------------------------------------------------------|
| Akindolire <sup>16</sup> | 2019 | Canada/high                         | Hip PJI                             | 50                                      | 50                                        | Total hospital<br>cost per case                                    | operation cost,<br>hospital bed,<br>investigation,<br>medication,<br>physical<br>therapy                                                                                                                                                     | CA\$38107                                                                                  | CA\$6764                                                                                    | Hospital bed<br>charges:<br>CA\$17423                                   |
| Alp <sup>17</sup>        | 2016 | Turkey/middle                       | Hip,<br>shoulder<br>and knee<br>PJI | 16                                      | 654                                       | Total hospital<br>cost per case                                    | antibiotics,<br>laboratory,<br>radiology,<br>prosthesis,<br>operation,<br>hospital bed                                                                                                                                                       | US\$16999                                                                                  | US\$5937                                                                                    | Prosthesis:<br>USD\$3872<br>Antibiotics:<br>USD\$1373                   |
| Brochin <sup>18</sup>    | 2018 | US/high                             | Knee PJI                            | 70011§                                  | 395198§                                   | Total hospital<br>cost per case<br>for<br>arthroplasty<br>revision | N/A                                                                                                                                                                                                                                          | adjusted median<br>cost increased<br>from<br>USD\$28240 to<br>\$31529 from<br>2003 to 2013 | adjusted<br>median<br>increased<br>from<br>USD\$18984<br>to \$19879<br>from 2003 to<br>2013 | N/A                                                                     |
| Iqbal <sup>19</sup>      | 2020 | Pakistan/middle                     | Knee PJI                            | 27                                      | 27                                        | Total hospital<br>cost per case                                    | hospital stay<br>cost: ward stay,<br>ICU, meal,<br>diagnostic test,<br>medication.<br>operating room<br>cost:<br>equipment,<br>medical staff                                                                                                 | US\$12,277                                                                                 | US\$2,690                                                                                   | Clinical<br>material<br>including<br>prosthesis:<br>\$9481              |
| Kapadia <sup>5</sup>     | 2014 | US/high                             | Knee PJI                            | 21                                      | 21                                        | Total hospital<br>cost per case                                    | fixed direct<br>medical cost:<br>hospital bed<br>charge, clinic<br>visit. Variable<br>direct charge:<br>pharmaceutical,<br>diagnostic test,<br>radiology etc.<br>Operating room<br>cost: implants,<br>iv solution,<br>surgical supply<br>etc | US\$116383                                                                                 | US\$28249                                                                                   | Operating<br>room<br>services:<br>US\$64675<br>Bed charge:<br>US\$25914 |
| Kapadia <sup>6</sup>     | 2016 | US/high                             | Hip PJI                             | 16                                      | 32                                        | Total hospital<br>cost per case                                    | fixed direct<br>medical cost:<br>hospital bed                                                                                                                                                                                                | US\$88623                                                                                  | US\$25659                                                                                   | Operating<br>room service:<br>\$46520                                   |

|                         |      |                |                  |           |           |                                                      |                                                                                                                                                               |                                                                                          |                                                                                                                             |                                   |
|-------------------------|------|----------------|------------------|-----------|-----------|------------------------------------------------------|---------------------------------------------------------------------------------------------------------------------------------------------------------------|------------------------------------------------------------------------------------------|-----------------------------------------------------------------------------------------------------------------------------|-----------------------------------|
|                         |      |                |                  |           |           |                                                      | charge, clinic visit. Variable direct charge: pharmaceutical, diagnostic test, radiology etc. Operating room cost: implants, iv solution, surgical supply etc |                                                                                          |                                                                                                                             | Bed charge: \$22359               |
| Kasch <sup>20</sup>     | 2017 | Germany/high   | Knee PJI         | 35        | 71        | Total hospital cost per case                         | Operation procedure, diagnostic cost, drugs, physiotherapy, ward cost                                                                                         | US\$12223                                                                                | US\$6749.43                                                                                                                 | Operating room service: \$5847    |
| Kurtz <sup>21</sup>     | 2008 | US/high        | Hip and knee PJI | NIS data§ | NIS data§ | Total hospital cost per case                         | N/A                                                                                                                                                           | Hip: US\$67415 in 1990, US\$70378 in 2004.<br>Knee: US\$59491 in 1990, US\$56275 in 2004 | Hip: US\$39057 in 1990, US\$39654 in 2004.<br>Knee: US\$35578 in 1990, US\$35769 in 2004                                    | N/A                               |
| Morcos <sup>22</sup>    | 2020 | Canada/high    | Knee PJI         | 73        | 73        | Total hospital cost per case                         | OR, Implants, hospital bed, medication, phyiotherapy                                                                                                          | CA\$35 430                                                                               | CA\$6810                                                                                                                    | Hospital bed charges: CA\$14236   |
| Padegimas <sup>23</sup> | 2015 | US/high        | Shoulder PJI     | 808§      | 81690§    | Total hospital cost per case                         | N/A                                                                                                                                                           | median charges were US\$42,248                                                           | median charges for total shoulder arthroplasty, hemi-arthroplasty, reverse shoulder were US\$40,823, US\$34,428, US\$57,390 | N/A                               |
| Peel <sup>24</sup>      | 2013 | Australia/high | Any PJI          | 21        | 42        | Total cost per case paid by the Victorian government | Inpatient: medical, nursing, operating theatre, prosthesis, ICU, coronary care unit, allied health, medical                                                   | AU\$69 414                                                                               | AU \$22 085                                                                                                                 | Inpatient nursing cost AU\$25 817 |

|                         |      |               |                  |           |           |                                                                |                                                                                                                                              |                                                                                                                           |                                                                                                            |                                                       |
|-------------------------|------|---------------|------------------|-----------|-----------|----------------------------------------------------------------|----------------------------------------------------------------------------------------------------------------------------------------------|---------------------------------------------------------------------------------------------------------------------------|------------------------------------------------------------------------------------------------------------|-------------------------------------------------------|
|                         |      |               |                  |           |           |                                                                | imaging, pathology, pharmacy, hospital-in-home. Outpatient: medical, nursing, allied health, medical imaging, pathology, pharmacy, emergency |                                                                                                                           |                                                                                                            |                                                       |
| Puhto <sup>25</sup>     | 2019 | Finland/high  | Hip and knee PJI | 42        | 1708      | Total hospital cost                                            | Ward care cost, ICU cost, procedure cost, costs for consultation, laboratory services, radiology, outpatient visits                          | Excess cost for treating a PJI was euro25,843                                                                             | mean cost of a total joint arthroplasty was euro7200, the excess cost of an aseptic revision was euro10900 | Procedure: euro12908<br>Ward care: e7132              |
| Romano <sup>12</sup>    | 2010 | Italy/high    | Hip PJI          | 40        | 40        | Total hospital cost per case                                   | operating room, hospital stay, material services, pharmacy                                                                                   | euro60394                                                                                                                 | euro27194                                                                                                  | Hospital stay: euro21442<br>Operating room: euro18367 |
| Stambough <sup>26</sup> | 2017 | US/high       | Any PJI          | N/A       | N/A       | Total hospital cost per case                                   | operative and variable hospital related costs                                                                                                | US\$41,495 for treating PJI                                                                                               | median cost of US\$9500 for a primary TJA                                                                  | N/A                                                   |
| Kurtz <sup>27</sup>     | 2012 | US/high       | Hip and knee PJI | NIS data§ | NIS data§ | Projected hospital cost, cost per case during the study period | N/A                                                                                                                                          | The future PJI cases are expected to incur a cost to US hospitals around \$785 million in 2010 and \$1.62 billion in 2020 | N/A                                                                                                        | N/A                                                   |
| Chang <sup>28</sup>     | 2020 | Taiwan/middle | Knee and hip PJI | N/A       | N/A       | Projected cost                                                 | N/A                                                                                                                                          | Estimated hospital costs in will increase from NT\$117,000,000 in 2013 to NT\$569,000,000 in 2035                         | N/A                                                                                                        | N/A                                                   |
| Kim <sup>29</sup>       | 2020 | Korea/high    | Any PJI          | N/A       | N/A       | Projected hospital cost                                        | N/A                                                                                                                                          | Total annual cost of PJI                                                                                                  |                                                                                                            |                                                       |

|                         |      |         |                  |           |           |                |     |                                                                                                                                                               |     |     |
|-------------------------|------|---------|------------------|-----------|-----------|----------------|-----|---------------------------------------------------------------------------------------------------------------------------------------------------------------|-----|-----|
|                         |      |         |                  |           |           | per case       |     | increased from US\$8.0 million in 2010 to US\$18.0 million in 2018 and was projected to exceed US\$57.0 million by 2030.                                      |     |     |
| Premkumar <sup>30</sup> | 2022 | US/high | Knee and hip PJI | NIS data§ | NIS data§ | Projected cost | N/A | the combined annual hospital costs were estimated to be US\$1.85 billion by 2030. This includes US\$753.4 million for THA PJI and US\$1.1 billion for TKA PJI | N/A | N/A |

§Data derived from the United States National Inpatient Sample (NIS) database

N/A=non-applicable, ICU=intensive care unit, THA=total hip arthroplasty, TKA= total knee arthroplasty

## References

1. Boddapati V, Fu MC, Mayman DJ, Su EP, Sculco PK, McLawhorn AS. Revision Total Knee Arthroplasty for Periprosthetic Joint Infection Is Associated With Increased Postoperative Morbidity and Mortality Relative to Noninfectious Revisions. *Journal of Arthroplasty*. 2018;33(2):521-6.



2. Choi H-R, Bedair H. Mortality following revision total knee arthroplasty: a matched cohort study of septic versus aseptic revisions. *The Journal of arthroplasty*. 2014;29(6):1216-8.
3. Gundtoft PH, Pedersen AB, Varnum C, Overgaard S. Increased Mortality After Prosthetic Joint Infection in Primary THA. *Clinical Orthopaedics and Related Research*. 2017;475(11):2623-31.
4. Hotchen AJ, Wismayer MG, Robertson-Waters E, McDonnell SM, Kendrick B, Taylor A, et al. The Joint-Specific BACH classification: A predictor of outcome in prosthetic joint infection. *EClinicalMedicine*. 2021;42:101192.
5. Kapadia BH, McElroy MJ, Issa K, Johnson AJ, Bozic KJ, Mont MA. The economic impact of periprosthetic infections following total knee arthroplasty at a specialized tertiary-care center. *Journal of Arthroplasty*. 2014;29(5):929-32.
6. Kapadia BH, Banerjee S, Cherian JJ, Bozic KJ, Mont MA. The Economic Impact of Periprosthetic Infections After Total Hip Arthroplasty at a Specialized Tertiary-Care Center. *Journal of Arthroplasty*. 2016;31(7):1422-6.
7. Shahi A, Tan TL, Chen AF, Maltenfort MG, Parvizi J. In-Hospital Mortality in Patients With Periprosthetic Joint Infection. *Journal of Arthroplasty*. 2017;32(3):948.
8. Wildeman P, Rolfson O, Soderquist B, Wretenberg P, Lindgren V. What Are the Long-term Outcomes of Mortality, Quality of Life, and Hip Function after Prosthetic Joint Infection of the Hip? A 10-year Follow-up from Sweden. *Clinical orthopaedics and related research*. 2021;479(10):2203-13.
9. Zmistowski B, Karam JA, Durinka JB, Casper DS, Parvizi J. Periprosthetic joint infection increases the risk of one-year mortality. *Journal of Bone and Joint Surgery - Series A*. 2013;95(24):2177-84.
10. Mur I, Jordan M, Rivera A, Pomar V, Gonzalez JC, Lopez-Contreras J, et al. Do prosthetic joint infections worsen the functional ambulatory outcome of patients with joint replacements? A retrospective matched cohort study. *Antibiotics*. 2020;9(12):1-15.
11. Poulsen NR, Mechlenburg I, Soballe K, Troelsen A, Lange J, Zawadski A, et al. Improved Patient-Reported Quality of Life and Hip Function After Cementless 1-Stage Revision of Chronic Periprosthetic Hip Joint Infection. *Journal of Arthroplasty*. 2019;34(11):2763.
12. Romano CL, Romano D, Logoluso N, Meani E. Septic versus aseptic hip revision: how different? *Journal of orthopaedics and traumatology : official journal of the Italian Society of Orthopaedics and Traumatology*. 2010;11(3):167-74.
13. Aboltins C, Dowsey MM, Peel T, Lim WK, Parikh S, Stanley P, et al. Early prosthetic hip joint infection treated with debridement, prosthesis retention and biofilm-active antibiotics: Functional outcomes, quality of life and complications. *Internal Medicine Journal*. 2013;43(7):810-5.
14. Aboltins C, Dowsey M, Peel T, Lim WK, Choong P. Good quality of life outcomes after treatment of prosthetic joint infection with debridement and prosthesis retention. *Journal of Orthopaedic Research*. 2016;34(5):898-902.
15. Walter N, Rupp M, Hierl K, Koch M, Kerschbaum M, Worlicek M, et al. Long-term patient-related quality of life after knee periprosthetic joint infection. *Journal of Clinical Medicine*. 2021;10(5):1-9.
16. Akindolire J, Morcos MW, Marsh JD, Howard JL, Lanting BA, Vasarhelyi EM. The economic impact of periprosthetic infection in total hip arthroplasty. *Canadian journal of surgery Journal canadien de chirurgie*. 2020;63(1):E52-E6.

17. Alp E, Cevahir F, Ersoy S, Guney A. Incidence and economic burden of prosthetic joint infections in a university hospital: A report from a middle-income country. *Journal of Infection and Public Health*. 2016;9(4):494-8.
18. Brochin RL, Phan K, Poeran J, Zubizarreta N, Galatz LM, Moucha CS. Trends in Periprosthetic Hip Infection and Associated Costs: A Population-Based Study Assessing the Impact of Hospital Factors Using National Data. *Journal of Arthroplasty*. 2018;33(7 Supplement):S233-S8.
19. Iqbal F, Shafiq B, Noor SS, Ali Z, Memon N, Memon N. Economic Burden of Periprosthetic Joint Infection Following Primary Total Knee Replacement in a Developing Country. *Clinics in orthopedic surgery*. 2020;12(4):470-6.
20. Kasch R, Merk S, Assmann G, Lahm A, Napp M, Merk H, et al. Comparative Analysis of Direct Hospital Care Costs between Aseptic and Two-Stage Septic Knee Revision. *PLoS one*. 2017;12(1):e0169558.
21. Kurtz SM, Lau E, Schmier J, Ong KL, Zhao K, Parvizi J. Infection Burden for Hip and Knee Arthroplasty in the United States. *Journal of Arthroplasty*. 2008;23(7):984-91.
22. Morcos MW, Kooner P, Marsh J, Howard J, Lanting B, Vasarhelyi E. The economic impact of periprosthetic infection in total knee arthroplasty. *Canadian journal of surgery Journal canadien de chirurgie*. 2021;64(2):E144-E8.
23. Padegimas EM, Maltenfort M, Ramsey ML, Williams GR, Parvizi J, Namdari S. Periprosthetic shoulder infection in the United States: Incidence and economic burden. *Journal of Shoulder and Elbow Surgery*. 2015;24(5):741-6.
24. Peel TN, Dowsey MM, Buising KL, Liew D, Choong PFM. Cost analysis of debridement and retention for management of prosthetic joint infection. *Clinical Microbiology and Infection*. 2013;19(2):181-6.
25. Puhto T, Puhto AP, Vielma M, Syrjala H. Infection triples the cost of a primary joint arthroplasty. *Infectious Diseases*. 2019;51(5):348-55.
26. Stambough JB, Nam D, Warren DK, Keeney JA, Clohisy JC, Barrack RL, et al. Decreased Hospital Costs and Surgical Site Infection Incidence With a Universal Decolonization Protocol in Primary Total Joint Arthroplasty. *Journal of Arthroplasty*. 2017;32(3):728.
27. Kurtz SM, Lau E, Watson H, Schmier JK, Parvizi J. Economic burden of periprosthetic joint infection in the united states. *Journal of Arthroplasty*. 2012;27(8 SUPPL.):61.
28. Chang CH, Lee SH, Lin YC, Wang YC, Chang CJ, Hsieh PH. Increased periprosthetic hip and knee infection projected from 2014 to 2035 in Taiwan. *Journal of Infection and Public Health*. 2020;13(11):1768-73.
29. Kim HS, Park JW, Moon SY, Lee YK, Ha YC, Koo KH. Current and Future Burden of Periprosthetic Joint Infection from National Claim Database. *Journal of Korean medical science*. 2020;35(49):e410.
30. Premkumar A, Kolin DA, Farley KX, Wilson JM, McLawhorn AS, Cross MB, et al. Projected Economic Burden of Periprosthetic Joint Infection of the Hip and Knee in the United States. *Journal of Arthroplasty*. 2021;36(5):1484.
